# Supplementary material for: Synthesis of 3D-hiearchical LiMPO4 (M = Fe, Mn) microstructures as cathode materials for lithium-ion batteries
Source: Royal Society of Chemistry journal article supplement (doi:10.1039/c3ce00072a), 2013-01-01
Supplement: c3ce00072a.pdf [file c3ce00072a.pdf]

### Supporting Information

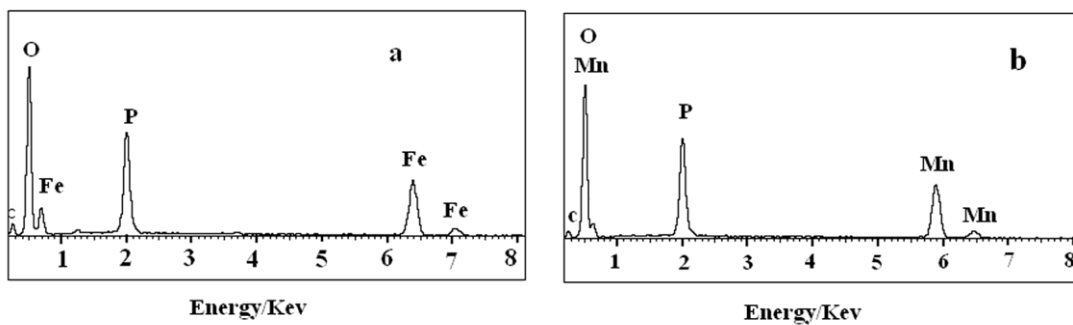

Fig. S1 EDS pattern of hierarchical  $\text{LiMnPO}_4$  microsphere prepared by solvothermal treatment at  $180\text{ }^\circ\text{C}$  for 24 h: (a)  $\text{LiFePO}_4$  and (b)  $\text{LiMnPO}_4$ .

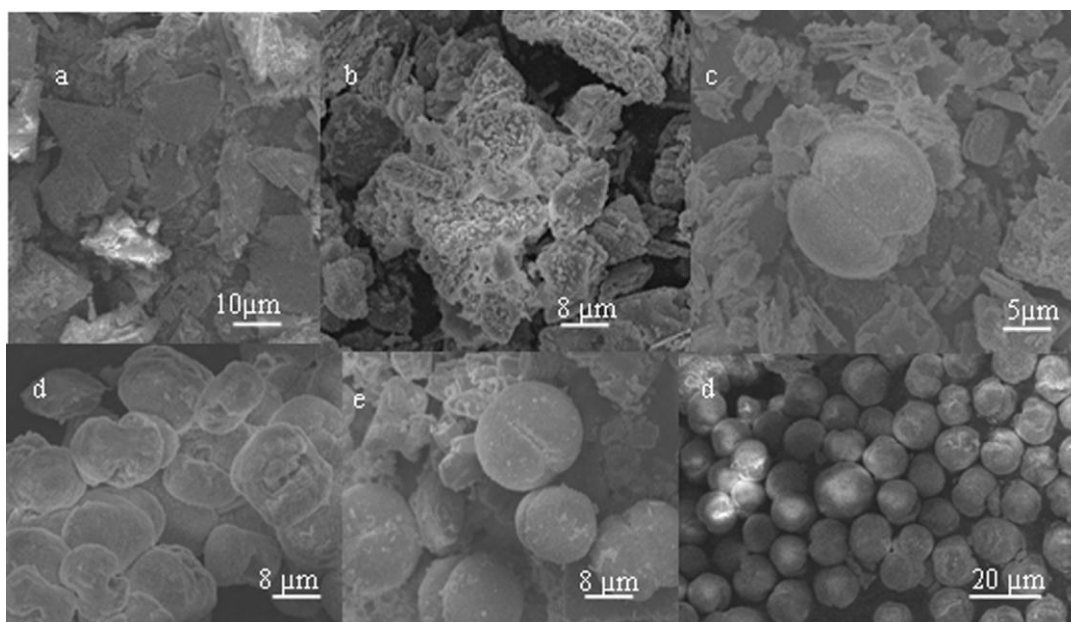

Fig. S2 The SEM images of the  $\text{LiMnPO}_4$  products collected by solvothermal treatment at  $180\text{ }^\circ\text{C}$  at different intervals: (a) 4 h, (b) 8 h, (c) 10 h, (d) 12 h, (e) 13 h and (f) 24 h.

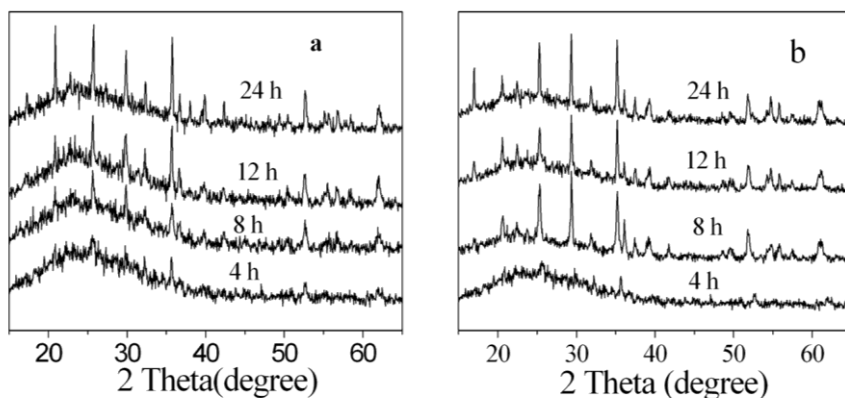

Fig. S3 XRD patterns of LiMPO<sub>4</sub> products prepared by solvothermal treatment at 180 °C for different reaction times: (a) LiFePO<sub>4</sub> and (b) LiMnPO<sub>4</sub>.

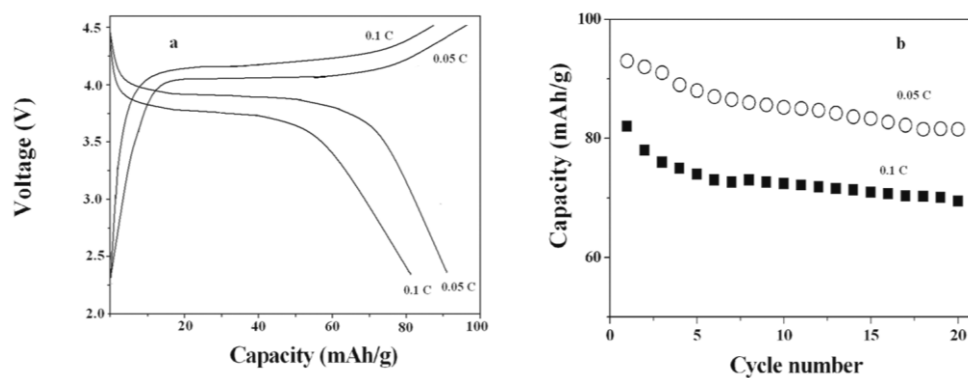

Fig. S4 The galvanostatic charge/discharge voltage profiles of LiMnPO<sub>4</sub> electrode between 2.3 and 4.5 V at different current densities, and (b) the corresponding cycling performance of at different current rates.
